# Supplementary material
Source: publisher figshare collection journal article supplement (https://karger.figshare.com/ndownloader/files/38900673)
Supplement: Supplementary file 1 [file 38900673]

Supplement Table 1.Municipalities in the state of São Paulo that performed more than 1000 PAP smear examinations in 2020 in comparison with the numbers performed in 2019 and 2021

| City | 2019 | 2020 | 2021 | Initial change | Subsequent impact |
| --- | --- | --- | --- | --- | --- |
|  |  |  |  | 2019/2020 | 2020/2021 |
| Boituva | 1688 | 1021 | 1875 | -39.5% | 83.6% |
| Piedade | 2316 | 1039 | 2078 | -55.1% | 100.00% |
| Porto Feliz | 3548 | 1177 | 2207 | -66.8% | 87.5% |
| Cajati | 2448 | 1184 | 2194 | -51.6% | 85.3% |
| Vargem Grande do Sul | 2693 | 1194 | 2266 | -55.7% | 89.8% |
| Espírito Santo do Pinhal | 1835 | 1379 | 1966 | -24.9% | 42.6% |
| Aguaí | 2005 | 1542 | 1885 | -23.1% | 22.2% |
| São José do Rio Pardo | 2155 | 1621 | 2417 | -24.8% | 49.1% |
| Embu-Guaçu | 3215 | 1759 | 2340 | -45.3% | 33.0% |
| Salto de Pirapora | 3352 | 1878 | 2053 | -44.0% | 9.3% |
| Cajamar | 4301 | 1935 | 4016 | -55.0% | 107.6% |
| Itapira | 3653 | 2052 | 3261 | -43.8% | 58.9% |
| Mogi Mirim | 6349 | 2568 | 5430 | -59.6% | 111.5% |
| Vargem Grande Paulista | 3453 | 2592 | 2971 | -24.9% | 14.6% |
| Caieiras | 5015 | 2775 | 5670 | -44.7% | 104.3% |
| Itapecerica da Serra | 5465 | 2792 | 4116 | -48.9% | 47.4% |
| Mairiporã | 4565 | 2961 | 4491 | -35.1% | 51.7% |
| São João da Boa Vista | 6109 | 3275 | 3852 | -46.4% | 17.6% |
| Franco da Rocha | 6590 | 3693 | 5760 | -44.0% | 56.0% |
| Ubatuba | 5509 | 4040 | 5031 | -26.7% | 24.5% |
| Francisco Morato | 8649 | 5106 | 5726 | -41.0% | 12.1% |
| Mogi Guaçu | 10677 | 5437 | 8678 | -49.1% | 59.6% |
| Embu | 12592 | 6265 | 10521 | -50.3% | 67.9% |
| Cotia | 11492 | 6373 | 8713 | -44,54% | 36.7% |
| Taboão da Serra | 13590 | 7363 | 8540 | -45.8% | 16.0% |
| São Paulo | 82327 | 49677 | 62097 | -39.7% | 25.0% |
|  |  |  |  |  |  |
| TOTAL | 215591 | 122698 | 170154 | -43.5% | 38.7% |

Supplement **Table 2.** Municipalities in the state of São Paulo that performed less than 1000 Pap smear examinations in 2020 in comparison with the numbers performed in 2019 and 2021

| City | 2019 | 2020 | 2021 | Initial change | Subsequent impact |
| --- | --- | --- | --- | --- | --- |
|  |  |  |  | 2019/2020 | 2020/2021 |
| Iporanga | 452 | 180 | 415 | -60.2% | 130.6% |
| Campina do Monte Alegre | 269 | 209 | 235 | -22.3% | 12.4% |
| Santo Antônio do Jardim | 354 | 255 | 357 | -28.0% | 40.0% |
| Barra do Turvo | 400 | 264 | 458 | -34.0% | 73.5% |
| Tapiraí | 537 | 274 | 357 | -49.0% | 30.3% |
| Divinolândia | 550 | 277 | 461 | -49.6% | 66.4% |
| São Lourenço da Serra | 973 | 280 | 817 | -71.2% | 191.8% |
| Águas da Prata | 403 | 327 | 292 | -18.9% | -10.7% |
| Pilar do Sul | 708 | 328 | 653 | -53.7% | 99.1% |
| Salesópolis | 578 | 374 | 472 | -35.9% | 26.2% |
| Tapiratiba | 890 | 391 | 746 | -56.1% | 90.8% |
| Cananéia | 831 | 439 | 777 | -47.2% | 77.0% |
| Eldorado | 922 | 508 | 755 | -44.9% | 48.6% |
| Ilha Comprida | 1103 | 545 | 865 | -50.6% | 58.7% |
| Casa Branca | 1036 | 554 | 1311 | -46.5% | 136.6% |
| Pariquera-Açu | 1322 | 571 | 1042 | -56.8% | 82.5% |
| Itobi | 812 | 596 | 646 | -26.6% | 8.4% |
| São Sebastião da Grama | 951 | 637 | 911 | -33.0% | 43.0% |
| Iperó | 1470 | 682 | 1384 | -53.6% | 102.9% |
| Rio Grande da Serra | 886 | 698 | 242 | -21.2% | -65.3% |
| Iguape | 1109 | 708 | 1501 | -36.2% | 112.0% |
| Caconde | 1213 | 720 | 1275 | -40.6% | 77.1% |
| Juquitiba | 1510 | 740 | 1745 | -51.0% | 135.8% |
| Araçoiaba da Serra | 2091 | 757 | 1354 | -63.8% | 78.9% |
| Ibiúna | 1948 | 760 | 1341 | -61.0% | 76.5% |
| Santa Cruz das Palmeiras | 1467 | 782 | 1032 | -46.7% | 32.0% |
| Tambaú | 1434 | 809 | 1435 | -43.6% | 77.4% |
| Mococa | 2447 | 815 | 2130 | -66.7% | 161.4% |
| Biritiba-Mirim | 1764 | 937 | 1043 | -46.9% | 11.3% |
|  |  |  |  |  |  |
| TOTAL | 30970 | 15698 | 26052 | -47.2% | 66.0% |

# 
